# Supplementary material
Source: publisher figshare collection journal article supplement (https://acs.figshare.com/ndownloader/files/3932962)
Supplement: Supplementary file 1 [file 3932962]

## Supporting Information

### **Electrochemical Performance of Electrospun Free-Standing Nitrogen-Doped Carbon Nanofibers and Their Application for Glucose Biosensing**

Dong Liu,<sup>†</sup> Xueping Zhang<sup>†,‡</sup> and Tianyan You<sup>\*,†</sup>

<sup>†</sup> State Key Laboratory of Electroanalytical Chemistry, Changchun Institute of Applied Chemistry, Chinese Academy of Sciences, 5625 Renmin Street, Changchun 130022, China

<sup>‡</sup> University of Chinese Academy of Sciences, 19A Yuquan Road, Beijing 100049, China

\*Corresponding author: Tianyan You

E-mail: [youty@ciac.jl.cn](mailto:youty@ciac.jl.cn)

**Figure S1**

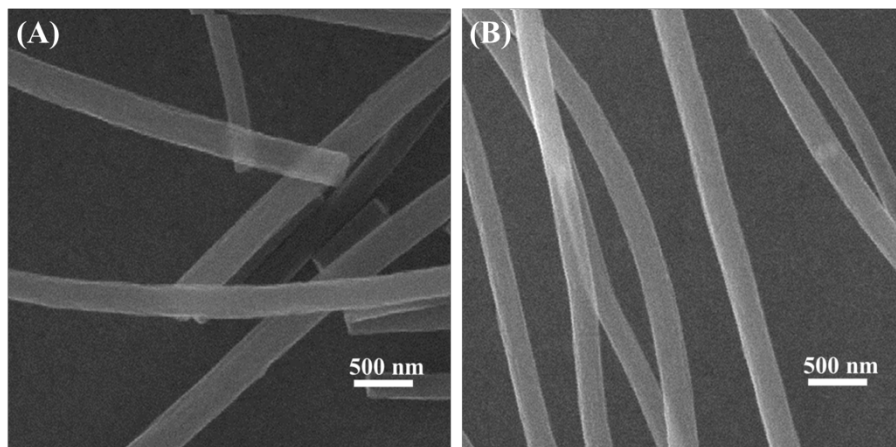

**Figure S1.** The SEM of CNFs (A) and NCNFs (B).

**Figure S2**

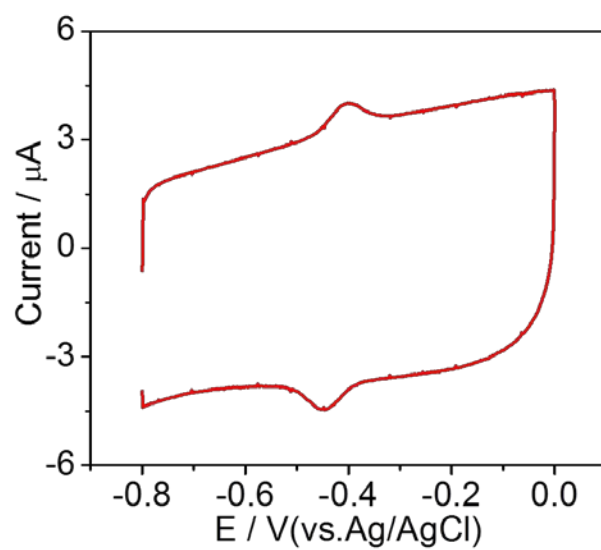

**Figure S2.** CVs of GOx/NCNFs/GCE in nitrogen-saturated 0.1 M PBS (pH 7.0). Scan rate: 50  $\text{mV s}^{-1}$ ;

**Figure S3**

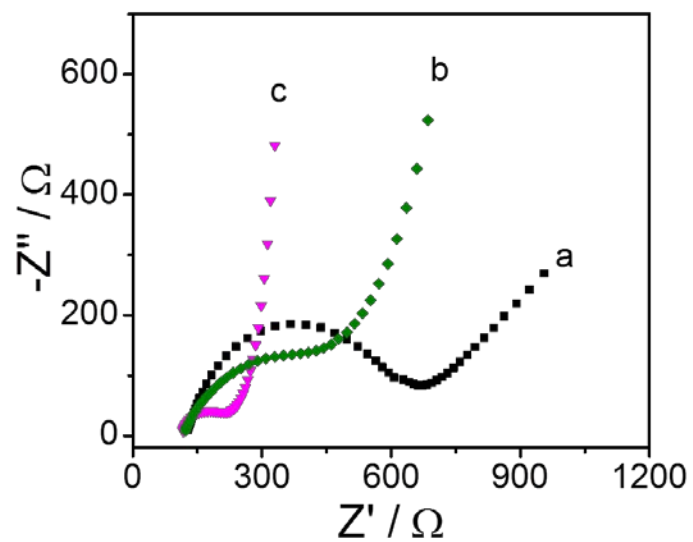

**Figure S3.** EIS of GCE(a), NCNFs/GCE (b) and GOx/NCNFs/GCE (c) in 0.1M KCl solution containing 5 mM  $K_3[Fe(CN)_6]/K_4[Fe(CN)_6]$ .
